# Supplementary material
Source: Copernicus journal article supplement (doi:10.5194/egusphere-2026-3625)
Supplement: Supplementary file 1 [file SI_Derrienetal.pdf › SI_Derrienetal.pdf]

1 Figure S1 : Land use map of the Rapel catchment (central Chile) showing major land cover classes, river  
 2 network, and sampling locations

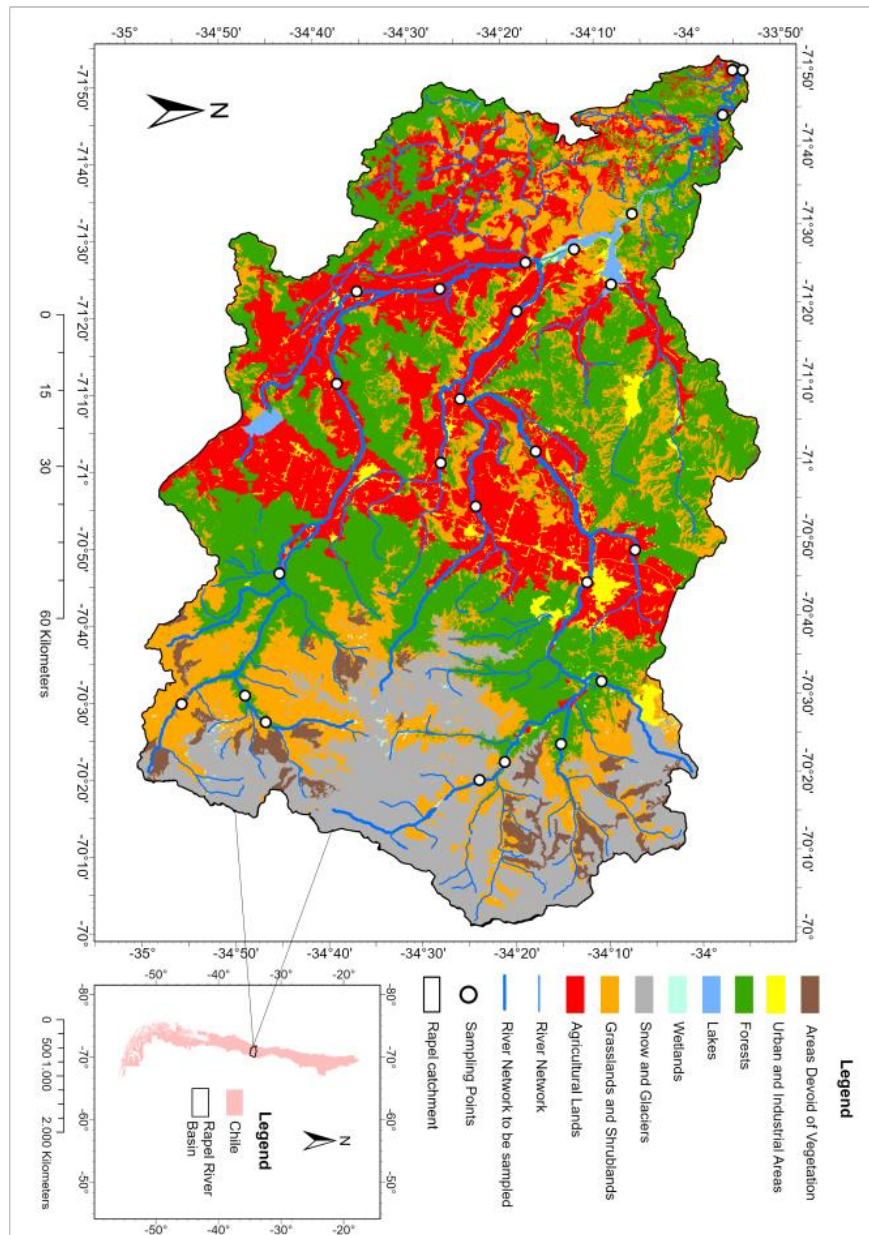

3

4

5 **Figure S2: Loadings of the 4 components validated by the PARAFAC analysis of the EEMs**

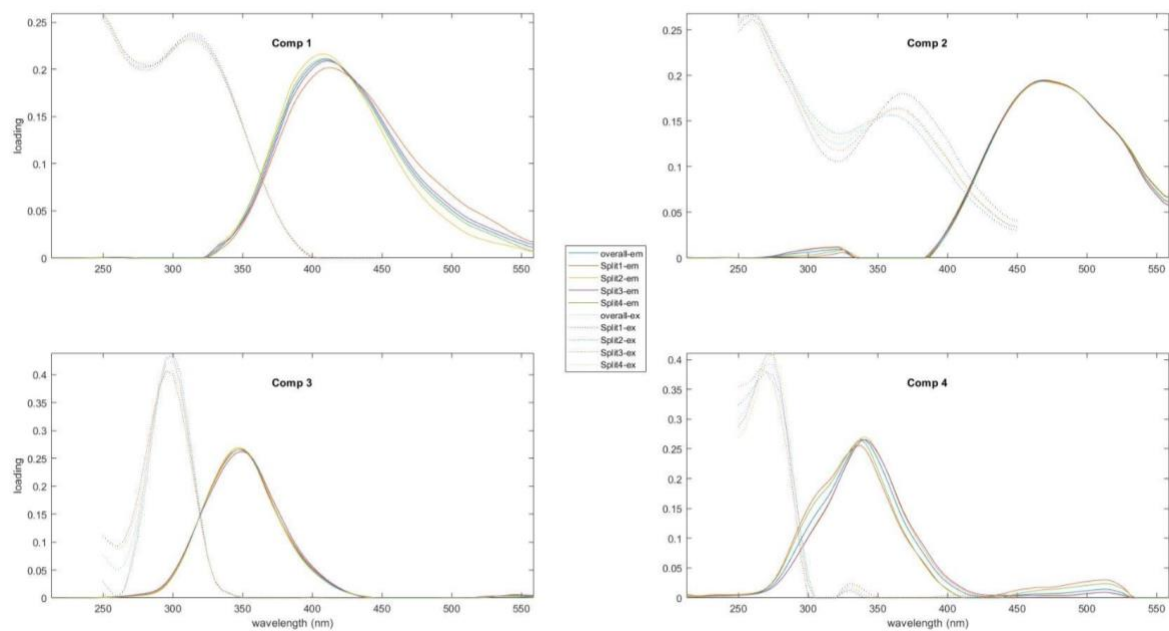

**Fig. S3 - PCoA ordination based on Bray–Curtis distances showing the spatial and seasonal structuring of microbial communities across subcatchments and altitudinal zones. Each point represents a sample replicate.**

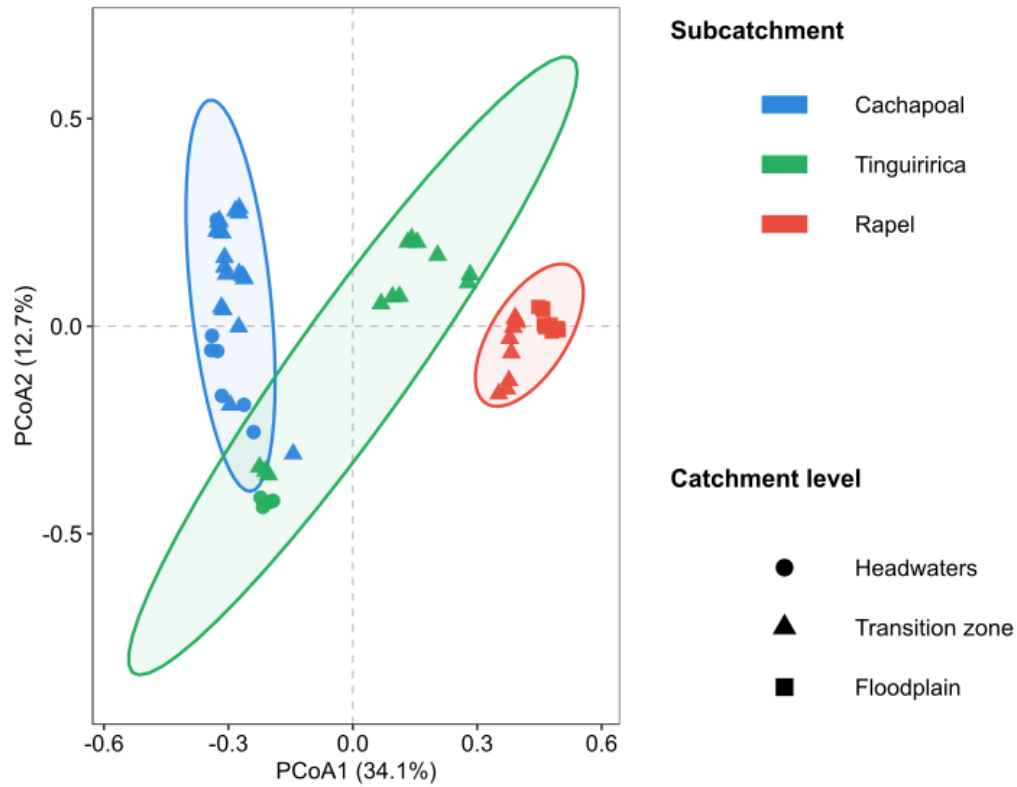

35 **Table S1: Excitation and Emission maxima of the 4 FDOM components validated by PARAFAC analysis**  
36 **of the EEMs, their attribution to specific groups of fluorophores, and references to some examples of**  
37 **similar components within the Openfluor Database (TCC>0.97).**

| Component | $\lambda_{ex\ max}$ | $\lambda_{em\ max}$ | Attribution            | Similar components within Openfluor                                                                                                       |
|-----------|---------------------|---------------------|------------------------|-------------------------------------------------------------------------------------------------------------------------------------------|
| C1mh      | 315                 | 409                 | “Microbial” humic-like | C2 in Logozzo et al. (2023)<br>C1 in Borisover et al. (2009)<br>C2 in Wampler et al. (2024)<br>C1 in Yan et al. (2020)19-06-2026 21:58:00 |
| C2th      | 260 (365)           | 469                 | Terrestrial humic-like | C2 in Yan et al. (2020)<br>C1 in Chen et al. (2019)<br>C1 in Menendez and Tzortziou (2024)<br>C2 in Borisover et al. (2009)               |
| C3p       | 300                 | 348                 | Protein-like           | C3 in Maurischat et al. (2022)<br>C6 in Eder et al. (2022)<br>C1 in Chen et al. (2018)                                                    |
| C4p       | 275                 | 338                 | Protein-like           | C6 in Lapierre and del Giorgio, (2014)<br>C7 in Lambert et al. (2017)<br>C7 in Eder et al. (2022)<br>C3 in Nimptsch et al. (2015)         |

38

## 39 References

- 40 Borisover, M., Laor, Y., Parparov, A., Bukhanovsky, N., and Lado, M.: Spatial and  
41 seasonal patterns of fluorescent organic matter in Lake Kinneret (Sea of Galilee) and its  
42 catchment basin, *Water Research*, 43, 3104–3116,  
43 <https://doi.org/10.1016/j.watres.2009.04.039>, 2009.
- 44 Chen, M., Jung, J., Lee, Y. K., and Hur, J.: Surface accumulation of low molecular weight  
45 dissolved organic matter in surface waters and horizontal off-shelf spreading of nutrients  
46 and humic-like fluorescence in the Chukchi Sea of the Arctic Ocean, *Science of The Total*  
47 *Environment*, 639, 624–632, <https://doi.org/10.1016/j.scitotenv.2018.05.205>, 2018.
- 48 Chen, S., Lu, Y., Dash, P., Das, P., Li, J., Capps, K., Majidzadeh, H., and Elliott, M.:  
49 Hurricane pulses: Small watershed exports of dissolved nutrients and organic matter during  
50 large storms in the Southeastern USA, *Science of The Total Environment*, 689, 232–244,  
51 <https://doi.org/10.1016/j.scitotenv.2019.06.351>, 2019.
- 52 Eder, A., Weigelhofer, G., Pucher, M., Tiefenbacher, A., Strauss, P., Brandl, M., and  
53 Blöschl, G.: Pathways and composition of dissolved organic carbon in a small agricultural

catchment during base flow conditions, *Ecohydrology & Hydrobiology*, 22, 96–112,  
<https://doi.org/10.1016/j.ecohyd.2021.07.012>, 2022.

Lambert, T., Bouillon, S., Darchambeau, F., Morana, C., Roland, F. A. E., Descy, J.-P., and  
 Borges, A. V.: Effects of human land use on the terrestrial and aquatic sources of fluvial  
 organic matter in a temperate river basin (The Meuse River, Belgium), *Biogeochemistry*,  
<https://doi.org/10.1007/s10533-017-0387-9>, 2017.

Lapierre, J. F. and del Giorgio, P. A.: Partial coupling and differential regulation of  
 biologically and photochemically labile dissolved organic carbon across boreal aquatic  
 networks, *Biogeosciences*, 11, 5969–5985, <https://doi.org/10.5194/bg-11-5969-2014>, 2014.

Logozzo, L. A., Hosen, J. D., McArthur, J., and Raymond, P. A.: Distinct drivers of two  
 size fractions of operationally dissolved iron in a temperate river, *Limnology and  
 Oceanography*, 68, 1185–1200, <https://doi.org/10.1002/lno.12338>, 2023.

Maurischat, P., Lehnert, L., Zerres, V. H. D., Tran, T. V., Kalbitz, K., Rinnan, Å., Li, X.  
 G., Dorji, T., and Guggenberger, G.: The glacial–terrestrial–fluvial pathway: A  
 multiparametrical analysis of spatiotemporal dissolved organic matter variation in three  
 catchments of Lake Nam Co, Tibetan Plateau, *Science of The Total Environment*, 838,  
 156542, <https://doi.org/10.1016/j.scitotenv.2022.156542>, 2022.

Menendez, A. and Tzortziou, M.: Driving factors of colored dissolved organic matter  
 dynamics across a complex urbanized estuary, *Science of The Total Environment*, 921,  
 171083, <https://doi.org/10.1016/j.scitotenv.2024.171083>, 2024.

Nimptsch, J., Woelfl, S., Osorio, S., Valenzuela, J., Ebersbach, P., von Tuempling, W.,  
 Palma, R., Encina, F., Figueroa, D., Kamjunke, N., and Graeber, D.: Tracing dissolved  
 organic matter (DOM) from land-based aquaculture systems in North Patagonian streams,  
*Science of the Total Environment*, 537, 129–138,  
<https://doi.org/https://doi.org/10.1016/j.scitotenv.2015.07.160>, 2015.

Wampler, K. A., Bladon, K. D., Myers-Pigg, A., and Jr., J. A. R.: Spatial and temporal  
 shifts in dissolved organic matter composition across a burned stream network, *ESS Open  
 Archive*, <https://doi.org/10.22541/essoar.173524605.50324304/v1>, 2024.

Yan, C., Sheng, Y., Ju, M., Ding, C., Li, Q., Luo, Z., Ding, M., and Nie, M.: Relationship  
 between the characterization of natural colloids and metal elements in surface waters,  
*Environ Sci Pollut Res*, 27, 31872–31883, <https://doi.org/10.1007/s11356-020-09500-x>,  
 2020.

90 **Table S2: Physical and chemical in-situ parameters, percentage of fluorescence components, and**  
91 **elements concentration in water samples of the Rapel catchment.** Metals and metalloids concentration  
92 below the detection limit of the instrument are indicated as <DL.

| Cachapoal subcatchment            |        |        |        |        |        |        |        |        |        |        |        |
|-----------------------------------|--------|--------|--------|--------|--------|--------|--------|--------|--------|--------|--------|
|                                   | C-C1   | C-C2   | C-C3   | C-C4   | C-C5   | C-Ca   | C-Cl   | C-Cor  | C-Coy  | C-P    | C-Z    |
| pH                                | 8.04   | 7.68   | 8.09   | 8.01   | 8.06   | 7.36   | 7.39   | 7.90   | 5.97   | 7.95   | 7.55   |
| EC ( $\mu\text{S cm}^{-1}$ )      | 635    | 386    | 435    | 610    | 542    | 596    | 377    | 269    | 746    | 307    | 451    |
| Salinity                          | 0.32   | 0.19   | 0.21   | 0.30   | 0.26   | 0.29   | 0.18   | 0.13   | 0.37   | 0.15   | 0.22   |
| Temp ( $^{\circ}\text{C}$ )       | 13.14  | 16.70  | 21.55  | 15.80  | 17.45  | 19.30  | 15.22  | 11.90  | 21.22  | 16.12  | 16.88  |
| DO ( $\text{mg L}^{-1}$ )         | 6.33   | 5.73   | 9.30   | 9.90   | 9.10   | 4.46   | 7.49   | 8.38   | 6.10   | 5.70   | 9.11   |
| TDS ( $\text{mg L}^{-1}$ )        | 320    | 194    | 218    | 305    | 271    | 300    | 189    | 135    | 376    | 143    | 225    |
| $\text{NO}_3^-$ ( $\mu\text{M}$ ) | 10.3   | 14.5   | 35.7   | 193.3  | 127.8  | 84.9   | 142.7  | 10.5   | 52.9   | 14.6   | 274.7  |
| C1mh (%)                          | 4.9    | 12.0   | 12.7   | 26.4   | 6.4    | 26.8   | 14.1   | 19.8   | 10.1   | 18.2   | 37.5   |
| C2th (%)                          | 0.1    | 8.8    | 9.7    | 21.2   | 5.0    | 14.4   | 12.9   | 15.5   | 3.5    | 13.1   | 30.7   |
| C3p (%)                           | 61.0   | 59.6   | 57.3   | 36.9   | 71.0   | 36.2   | 54.9   | 37.4   | 61.0   | 50.3   | 15.6   |
| C4p (%)                           | 34.0   | 19.7   | 20.3   | 15.6   | 17.7   | 22.7   | 18.1   | 27.3   | 25.4   | 18.4   | 16.3   |
| Ag (ppm)                          | 0.022  | <DL    |
| Al (ppm)                          | 0.043  | 0.065  | 0.042  | 0.006  | 0.015  | 0.017  | 0.005  | 0.002  | 0.021  | 0.075  | <DL    |
| As (ppm)                          | 0.016  | 0.004  | 0.009  | 0.007  | 0.009  | 0.006  | 0.004  | 0.000  | 0.002  | 0.010  | 0.000  |
| B (ppm)                           | 0.126  | <DL    | 0.015  | 0.003  | 0.011  | 0.017  | <DL    | <DL    | <DL    | <DL    | <DL    |
| Ba (ppm)                          | 0.014  | 0.011  | 0.013  | 0.015  | 0.016  | 0.016  | 0.007  | 0.008  | 0.018  | 0.015  | 0.007  |
| Be (ppm)                          | 0.001  | <DL    | 0.002  | <DL    |
| Ca (ppm)                          | 23.204 | 21.067 | 21.866 | 24.261 | 23.670 | 21.763 | 21.269 | 20.457 | 24.331 | 19.719 | 22.232 |
| Cd (ppm)                          | 0.001  | <DL    | 0.005  | 0.002  | <DL    |
| Cr (ppm)                          | 0.007  | 0.001  | 0.002  | 0.002  | 0.001  | 0.004  | 0.001  | 0.001  | 0.002  | 0.004  | <DL    |
| Cu (ppm)                          | 0.005  | 0.017  | 0.005  | 0.004  | 0.006  | 0.027  | 0.006  | 0.000  | 4.710  | 0.003  | <DL    |
| Fe (ppm)                          | 0.028  | 0.020  | 0.008  | 0.010  | 0.006  | 0.028  | 0.009  | 0.006  | 0.016  | 0.007  | <DL    |
| K (ppm)                           | 3.056  | 1.876  | 2.310  | 2.413  | 2.548  | 5.073  | 1.222  | 0.756  | 2.507  | 0.971  | 2.113  |
| Li (ppm)                          | 0.089  | 0.043  | 0.047  | 0.026  | 0.033  | 0.048  | 0.009  | 0.002  | 0.011  | 0.026  | 0.005  |
| Mg (ppm)                          | 5.268  | 4.478  | 5.038  | 8.899  | 7.665  | 6.313  | 6.159  | 2.328  | 12.066 | 4.331  | 9.705  |
| Mn (ppm)                          | 0.049  | 0.083  | 0.020  | 0.015  | 0.016  | 0.017  | 0.005  | 0.003  | 2.168  | 0.013  | 0.018  |
| Mo (ppm)                          | 0.003  | 0.001  | 0.002  | 0.000  | 0.001  | 0.000  | <DL    | 0.001  | 0.013  | 0.003  | <DL    |

|          |        |        |        |        |        |        |        |        |        |        |        |
|----------|--------|--------|--------|--------|--------|--------|--------|--------|--------|--------|--------|
| Na (ppm) | 17.400 | 12.024 | 13.705 | 15.940 | 15.563 | 20.552 | 10.042 | 3.452  | 22.218 | 7.085  | 14.393 |
| Ni (ppm) | 0.006  | 0.002  | 0.001  | 0.001  | 0.001  | 0.002  | 0.001  | 0.001  | 0.023  | 0.004  | <DL    |
| P (ppm)  | 0.004  | 0.003  | 0.020  | 0.019  | 0.024  | 0.384  | 0.019  | 0.006  | <DL    | 0.006  | 0.115  |
| Pb (ppm) | 0.004  | 0.001  | 0.001  | 0.002  | 0.002  | <DL    | 0.000  | <DL    | 0.001  | 0.006  | 0.001  |
| S (ppm)  | 38.206 | 28.386 | 29.606 | 38.132 | 34.680 | 30.613 | 20.516 | 25.474 | 99.744 | 20.969 | 26.097 |
| Se (ppm) | 0.002  | 0.001  | 0.001  | <DL    | 0.002  | 0.001  | 0.000  | 0.002  | 0.003  | 0.006  | <DL    |
| V (ppm)  | 0.007  | 0.004  | 0.004  | 0.012  | 0.010  | 0.007  | 0.007  | 0.002  | 0.017  | 0.006  | 0.016  |
| Zn (ppm) | 0.003  | 0.001  | <DL    | <DL    | 0.000  | 0.007  | 0.000  | <DL    | 0.796  | 0.002  | <DL    |

**Tinguiririca subcatchment**

|                                   | <b>T-T1</b> | <b>T-T2</b> | <b>T-T3</b> | <b>T-T4</b> | <b>T-A</b> | <b>T-Ch</b> | <b>T-CI</b> | <b>T-P</b> |
|-----------------------------------|-------------|-------------|-------------|-------------|------------|-------------|-------------|------------|
| pH                                | 7.62        | 7.30        | 7.68        | 7.73        | 7.45       | 7.54        | 7.41        | 7.38       |
| EC ( $\mu\text{S cm}^{-1}$ )      | 284         | 170         | 254         | 288         | 188        | 319         | 39          | 125        |
| Salinity                          | 0.14        | 0.08        | 0.12        | 0.14        | 0.09       | 0.15        | 0.02        | 0.06       |
| Temp ( $^{\circ}\text{C}$ )       | 8.60        | 14.13       | 15.79       | 18.01       | 15.39      | 16.34       | 17.05       | 12.46      |
| DO ( $\text{mg L}^{-1}$ )         | 8.37        | 9.20        | 9.10        | 8.98        | 7.48       | 8.43        | 9.03        | 8.43       |
| TDS ( $\text{mg L}^{-1}$ )        | 141         | 85          | 127         | 142         | 94         | 159         | 19          | 62         |
| $\text{NO}_3^-$ ( $\mu\text{M}$ ) | 11.5        | 11.8        | 28.4        | 36.0        | 6.5        | 38.7        | 4.0         | 9.4        |
| C1mh (%)                          | 26.1        | 5.6         | 23.9        | 42.1        | 3.9        | 22.1        | 5.6         | 23.0       |
| C2th (%)                          | 12.3        | 0.7         | 19.0        | 33.7        | 0.0        | 17.1        | 0.9         | 14.7       |
| C3p (%)                           | 22.4        | 60.4        | 41.5        | 11.3        | 62.4       | 43.8        | 60.4        | 35.2       |
| C4p (%)                           | 39.2        | 33.3        | 15.7        | 12.9        | 33.8       | 17.0        | 33.0        | 27.2       |
| Ag (ppm)                          | <DL         | <DL         | <DL         | <DL         | <DL        | <DL         | <DL         | <DL        |
| Al (ppm)                          | 0.044       | 0.036       | 0.017       | 0.014       | 0.063      | 0.006       | 0.016       | 0.055      |
| As (ppm)                          | 0.004       | 0.002       | 0.000       | 0.002       | 0.002      | 0.000       | <DL         | <DL        |
| B (ppm)                           | <DL         | <DL         | <DL         | <DL         | 0.034      | <DL         | <DL         | <DL        |
| Ba (ppm)                          | 0.008       | 0.004       | 0.005       | 0.008       | 0.004      | 0.009       | 0.000       | 0.003      |
| Be (ppm)                          | <DL         | <DL         | <DL         | <DL         | <DL        | <DL         | <DL         | <DL        |
| Ca (ppm)                          | 18.778      | 14.627      | 17.056      | 18.045      | 13.569     | 18.781      | 5.164       | 12.403     |
| Cd (ppm)                          | <DL         | <DL         | <DL         | <DL         | <DL        | <DL         | <DL         | <DL        |



|          |        |        |        |        |        |        |       |        |
|----------|--------|--------|--------|--------|--------|--------|-------|--------|
| Cr (ppm) | 0.004  | 0.001  | 0.001  | 0.001  | 0.001  | 0.000  | 0.001 | 0.001  |
| Cu (ppm) | 0.002  | 0.001  | 0.001  | 0.001  | 0.000  | 0.000  | 0.001 | 0.000  |
| Fe (ppm) | 0.027  | 0.009  | 0.007  | 0.009  | 0.008  | 0.014  | 0.014 | 0.010  |
| K (ppm)  | 1.044  | 0.722  | 1.182  | 1.423  | 1.570  | 1.728  | 0.132 | 0.344  |
| Li (ppm) | 0.033  | 0.006  | 0.007  | 0.007  | 0.004  | 0.008  | <DL   | 0.002  |
| Mg (ppm) | 2.961  | 2.477  | 4.110  | 4.799  | 4.249  | 5.054  | 0.649 | 1.914  |
| Mn (ppm) | 0.080  | 0.032  | 0.009  | 0.005  | 0.090  | 0.030  | 0.001 | 0.043  |
| Mo (ppm) | <DL    | <DL    | <DL    | <DL    | <DL    | <DL    | <DL   | <DL    |
| Na (ppm) | 8.881  | 4.923  | 8.358  | 9.390  | 6.543  | 11.674 | 1.368 | 3.041  |
| Ni (ppm) | 0.003  | 0.001  | 0.001  | 0.000  | 0.001  | 0.000  | 0.001 | 0.001  |
| P (ppm)  | <DL    | 0.001  | 0.002  | 0.010  | <DL    | 0.009  | 0.006 | <DL    |
| Pb (ppm) | 0.002  | 0.001  | 0.001  | 0.002  | 0.001  | 0.001  | 0.000 | 0.000  |
| S (ppm)  | 25.025 | 11.626 | 16.601 | 17.793 | 17.567 | 19.740 | <DL   | 10.006 |
| Se (ppm) | 0.002  | 0.005  | 0.003  | 0.002  | 0.001  | <DL    | <DL   | 0.003  |
| V (ppm)  | 0.002  | 0.000  | 0.004  | 0.005  | 0.002  | 0.005  | <DL   | <DL    |
| Zn (ppm) | 0.000  | 0.000  | <DL    | <DL    | <DL    | <DL    | 0.001 | <DL    |

**Rapel subcatchment**

|                                   | <b>R-R1</b> | <b>R-R2</b> | <b>R-R3</b> | <b>R-R4</b> | <b>R-R5</b> | <b>R-S</b> |
|-----------------------------------|-------------|-------------|-------------|-------------|-------------|------------|
| pH                                | 8.02        | 8.90        | 8.77        | 8.06        | 7.80        | 7.88       |
| EC ( $\mu\text{S cm}^{-1}$ )      | 462         | 581         | 432         | 410         | 409         | 2513       |
| Salinity                          | 0.22        | 0.28        | 0.21        | 0.20        | 0.20        | 1.28       |
| Temp ( $^{\circ}\text{C}$ )       | 20.04       | 23.05       | 23.12       | 19.88       | 18.72       | 18.74      |
| DO ( $\text{mg L}^{-1}$ )         | 6.20        | 11.50       | 10.30       | 10.35       | 9.31        | 8.96       |
| TDS ( $\text{mg L}^{-1}$ )        | 230         | 292         | 216         | 205         | 204         | 1264       |
| $\text{NO}_3^-$ ( $\mu\text{M}$ ) | 19.8        | 5.4         | 54.9        | 66.1        | 65.4        | 54.4       |
| C1mh (%)                          | 35.3        | 18.6        | 23.1        | 35.4        | 17.5        | 3.8        |
| C2th (%)                          | 26.2        | 13.6        | 16.2        | 24.6        | 12.5        | 3.1        |
| C3p (%)                           | 19.6        | 48.4        | 41.8        | 22.4        | 52.5        | 74.3       |
| C4p (%)                           | 18.8        | 19.3        | 18.9        | 17.6        | 17.5        | 18.9       |
| Ag (ppm)                          | <DL         | <DL         | <DL         | <DL         | <DL         | <DL        |

|          |        |        |        |        |        |        |
|----------|--------|--------|--------|--------|--------|--------|
| Al (ppm) | 0.002  | 0.005  | 0.013  | 0.011  | 0.003  | <DL    |
| As (ppm) | 0.005  | 0.002  | 0.004  | 0.004  | 0.006  | 0.006  |
| B (ppm)  | <DL    | <DL    | <DL    | <DL    | <DL    | 0.028  |
| Ba (ppm) | 0.024  | 0.028  | 0.016  | 0.013  | 0.014  | 0.011  |
| Be (ppm) | <DL    | <DL    | <DL    | <DL    | <DL    | <DL    |
| Ca (ppm) | 22.288 | 23.393 | 21.308 | 20.943 | 21.211 | 21.667 |
| Cd (ppm) | <DL    | <DL    | <DL    | <DL    | <DL    | <DL    |
| Cr (ppm) | 0.002  | 0.002  | 0.001  | 0.004  | 0.002  | 0.001  |
| Cu (ppm) | 0.004  | 0.003  | 0.003  | 0.005  | 0.004  | 0.002  |
| Fe (ppm) | 0.012  | 0.016  | 0.010  | 0.020  | 0.011  | 0.006  |
| K (ppm)  | 2.383  | 4.421  | 2.272  | 1.954  | 2.085  | 13.890 |
| Li (ppm) | 0.025  | 0.019  | 0.020  | 0.019  | 0.019  | 0.021  |
| Mg (ppm) | 7.137  | 9.257  | 6.486  | 6.013  | 6.239  | 22.378 |
| Mn (ppm) | 0.001  | 0.004  | 0.003  | 0.006  | 0.003  | 0.003  |
| Mo (ppm) | 0.001  | 0.041  | 0.006  | 0.002  | 0.004  | 0.003  |
| Na (ppm) | 14.513 | 17.987 | 13.280 | 11.950 | 12.690 | 79.169 |
| Ni (ppm) | 0.001  | 0.001  | 0.001  | 0.003  | 0.002  | 0.001  |
| P (ppm)  | 0.008  | 0.006  | 0.000  | 0.021  | 0.019  | 0.023  |
| Pb (ppm) | 0.002  | 0.002  | 0.002  | 0.000  | 0.002  | 0.001  |
| S (ppm)  | 28.162 | 51.145 | 27.202 | 24.364 | 25.917 | 49.829 |
| Se (ppm) | 0.003  | 0.002  | 0.002  | 0.001  | 0.000  | <DL    |
| V (ppm)  | 0.009  | 0.015  | 0.008  | 0.008  | 0.007  | 0.055  |
| Zn (ppm) | <DL    | <DL    | <DL    | 0.000  | 0.000  | <DL    |
